# Supplementary material for: Acid Adaptation Promotes TRPC1 Plasma Membrane Localization Leading to Pancreatic Ductal Adenocarcinoma Cell Proliferation and Migration through Ca2+ Entry and Interaction with PI3K/CaM
Source: MDPI journal article supplement (doi:10.3390/cancers14194946), 2022-10-09

# Figure 1

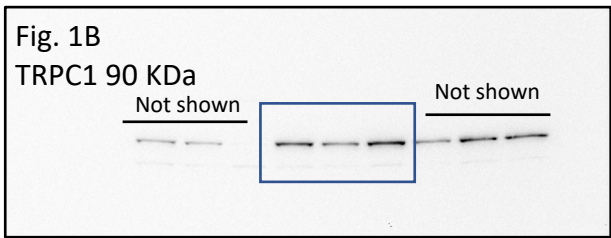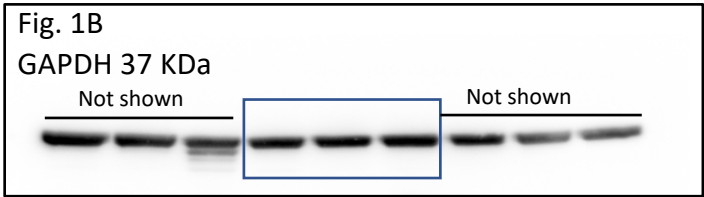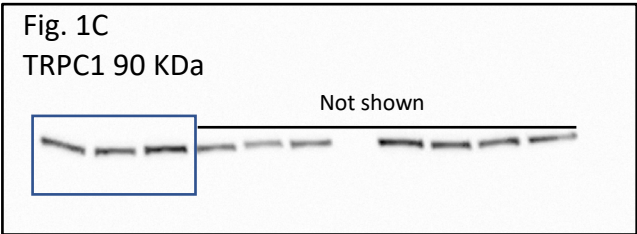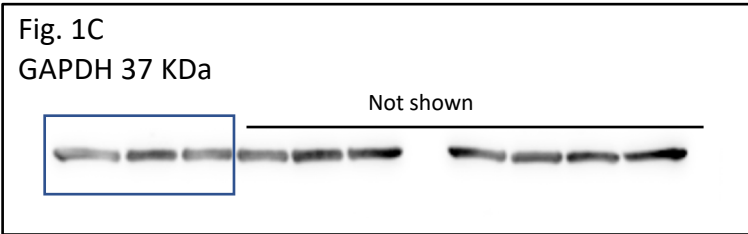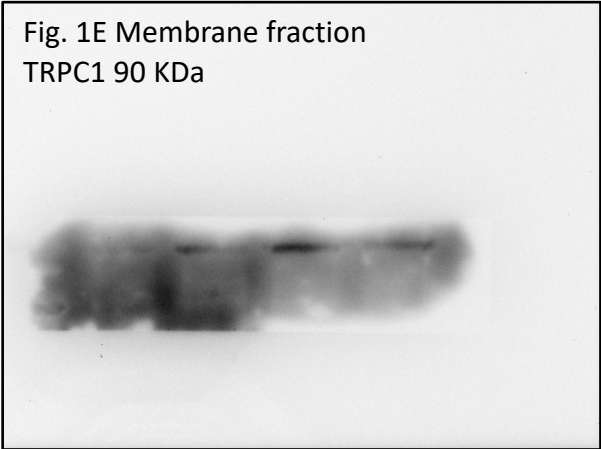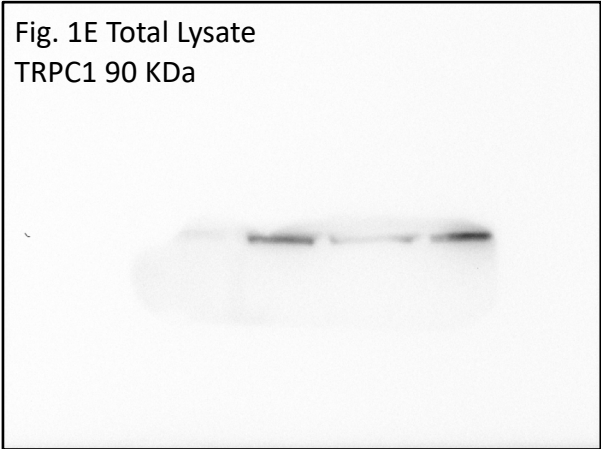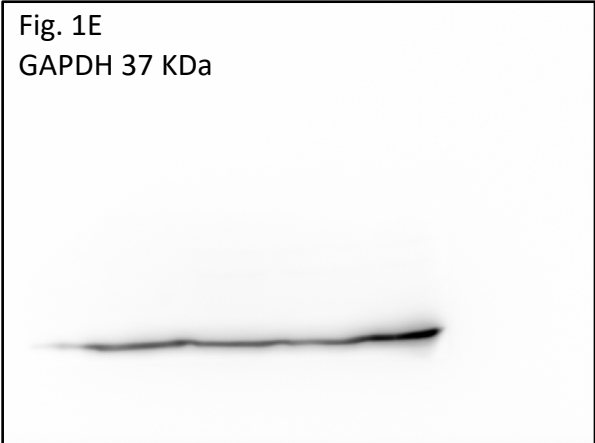

# Supplemental Figure S1

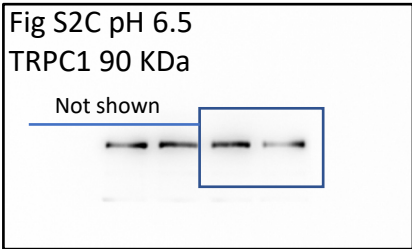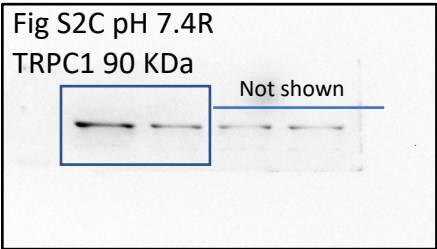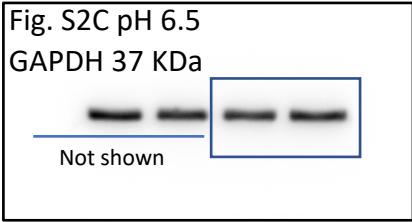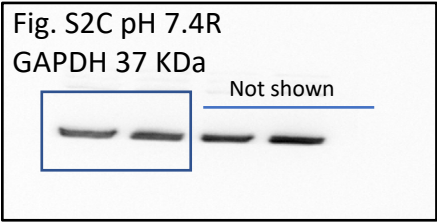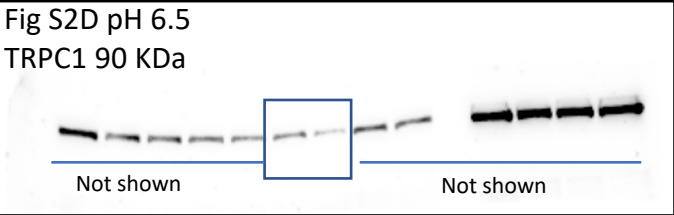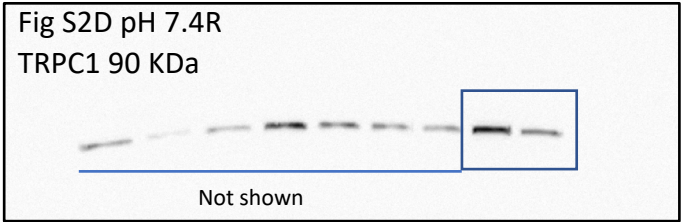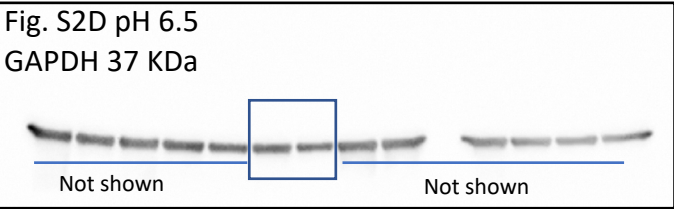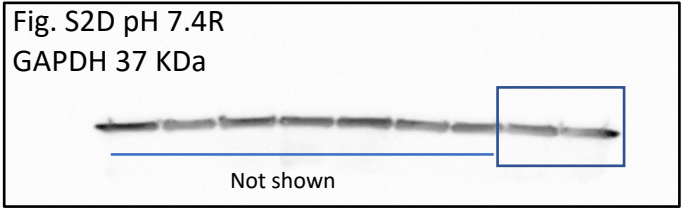

Figure 5A

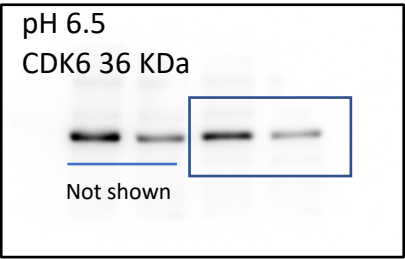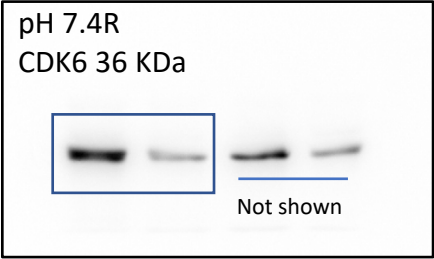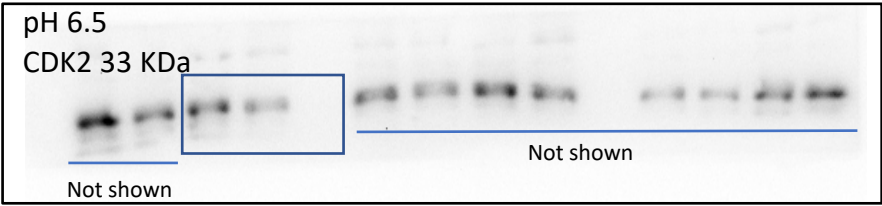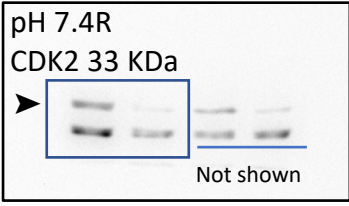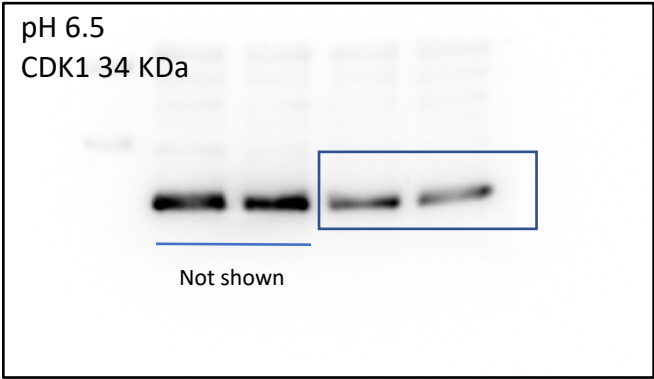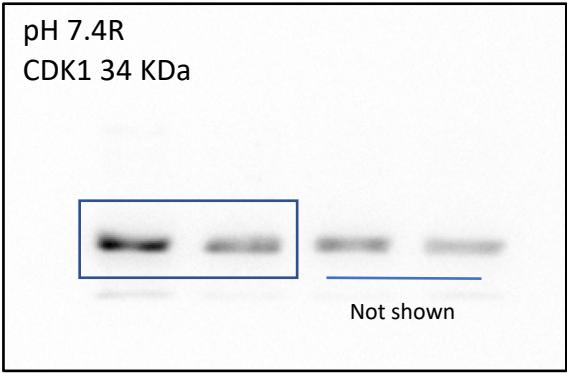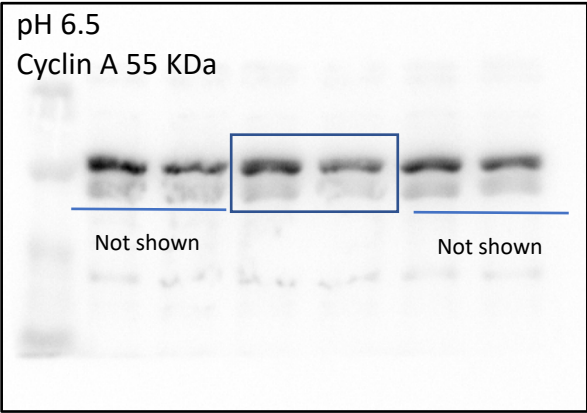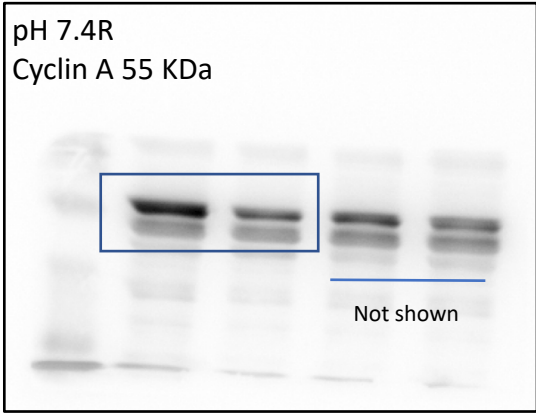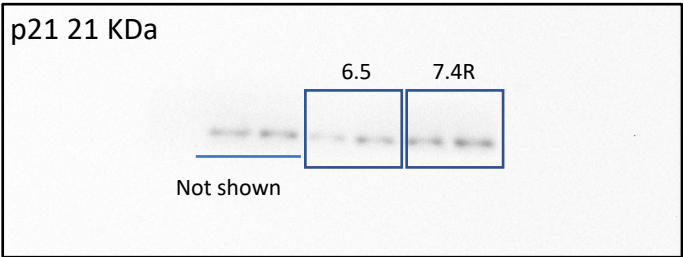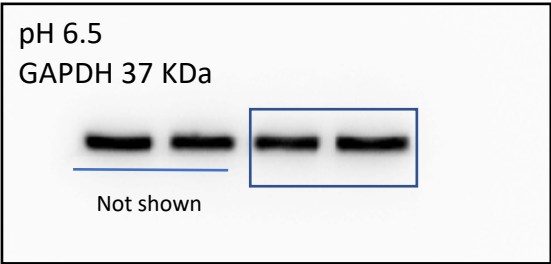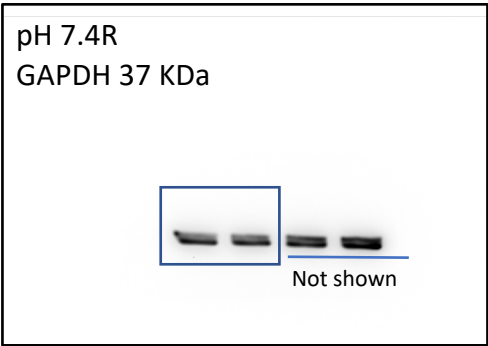

Supplemental Figure S3A

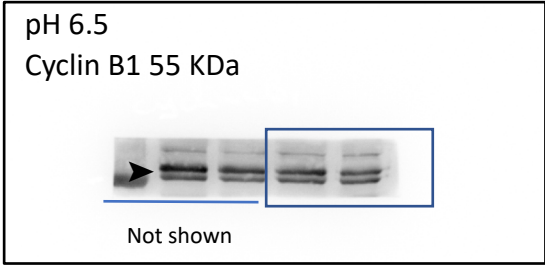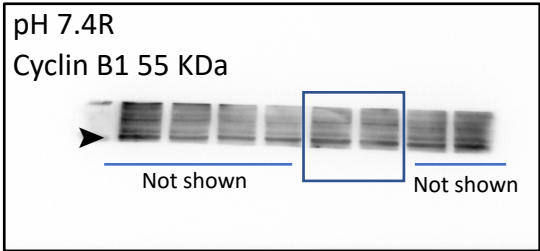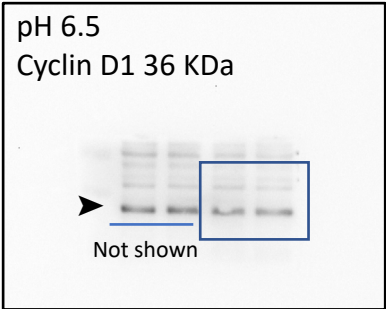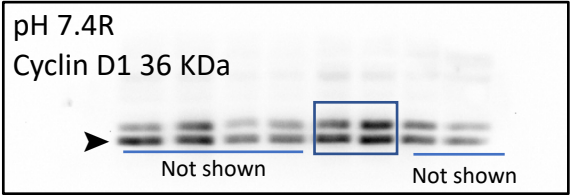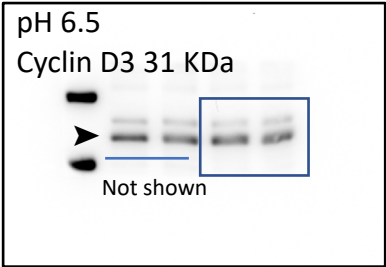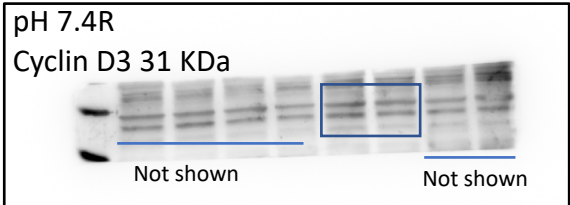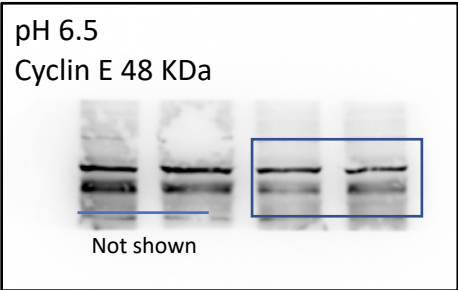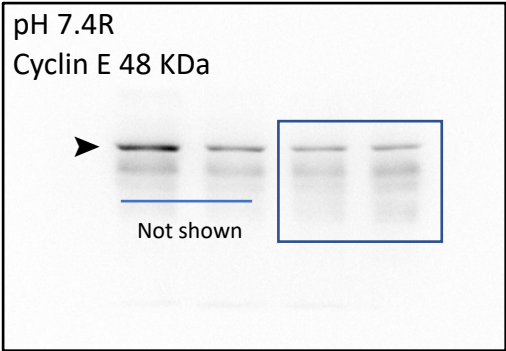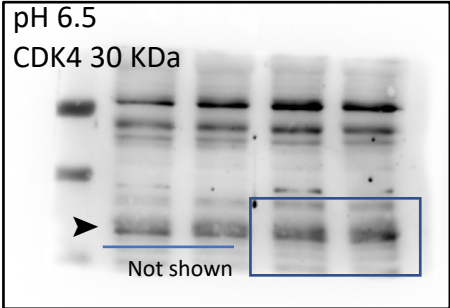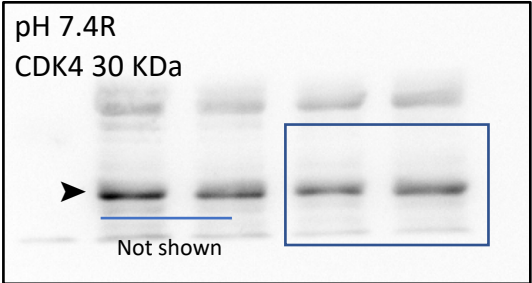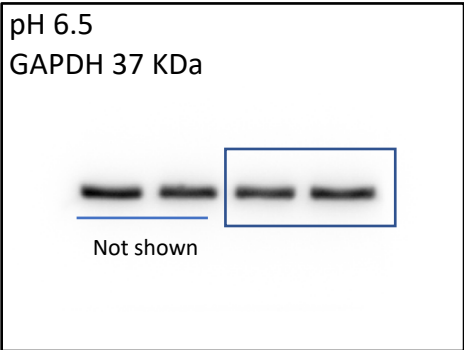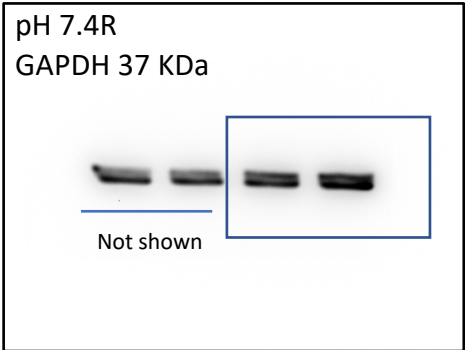



# Supplemental Figure S3B

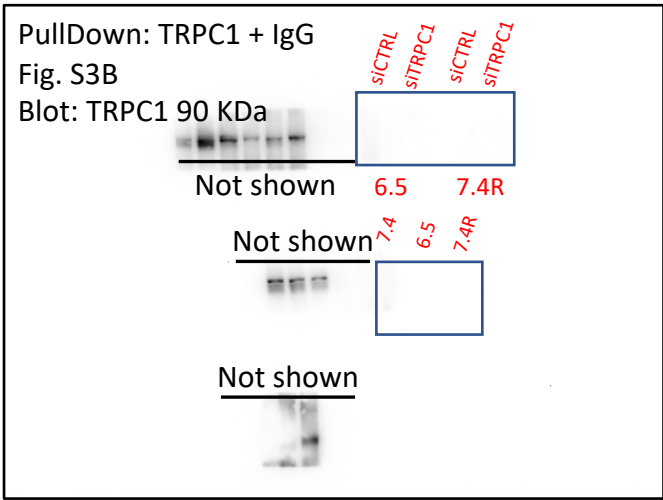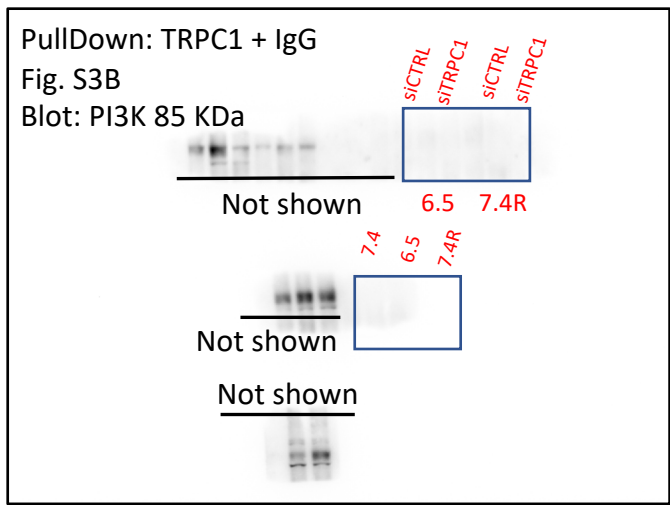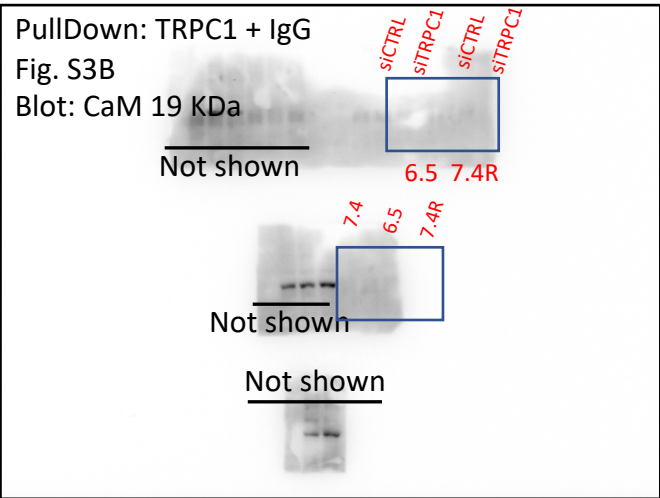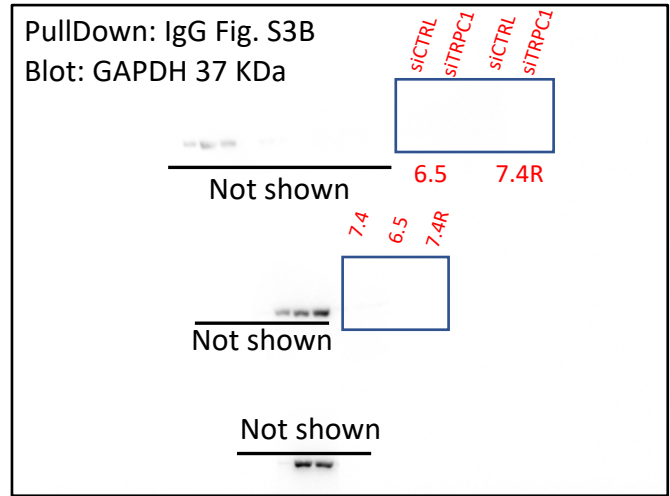

Figure 6D

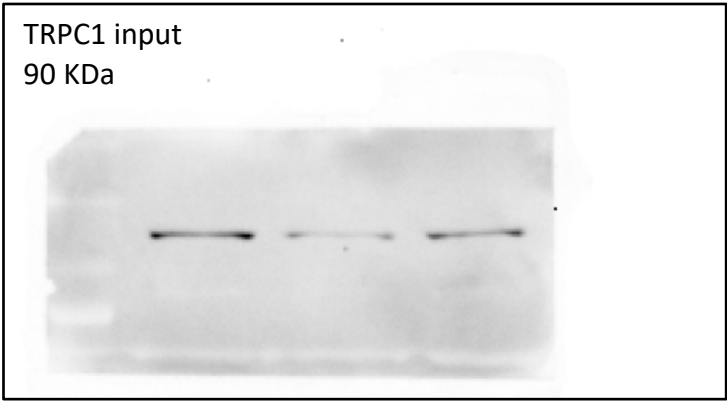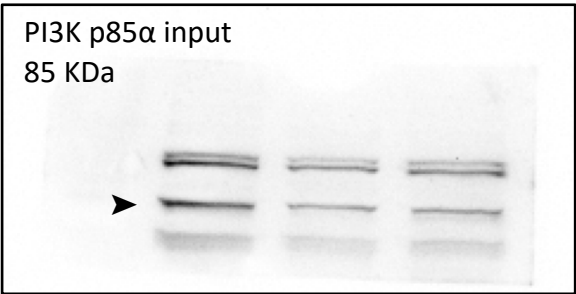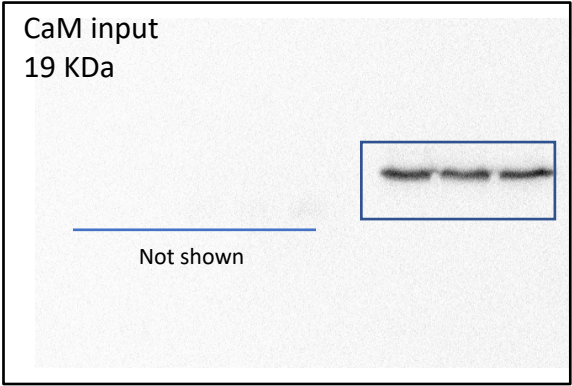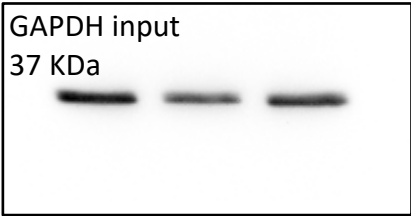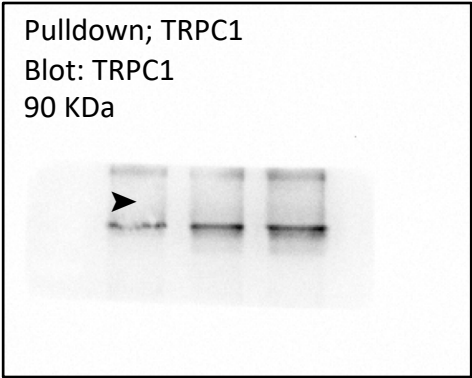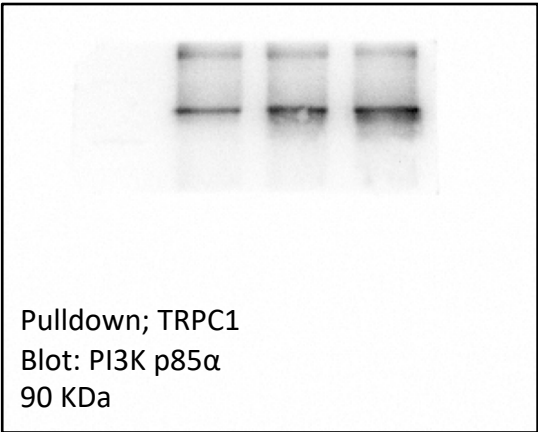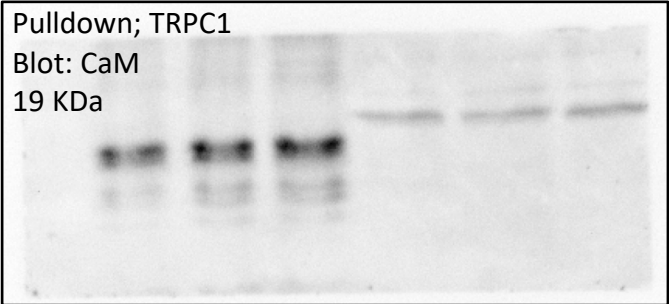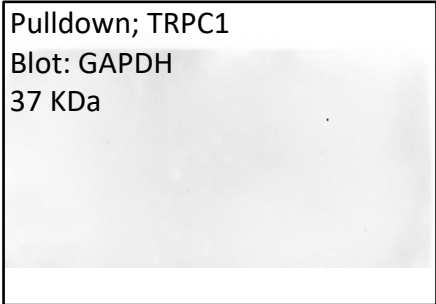

Figure 6D

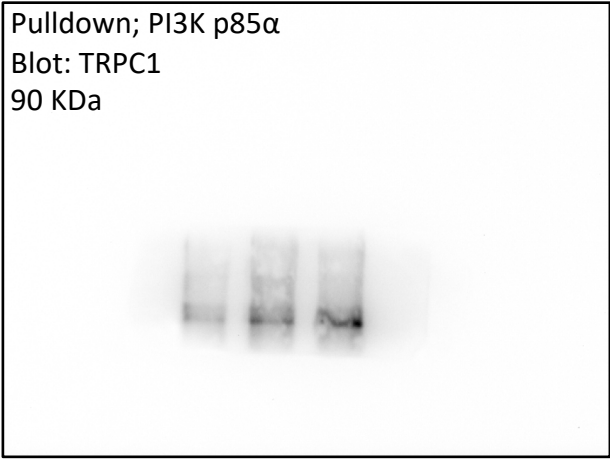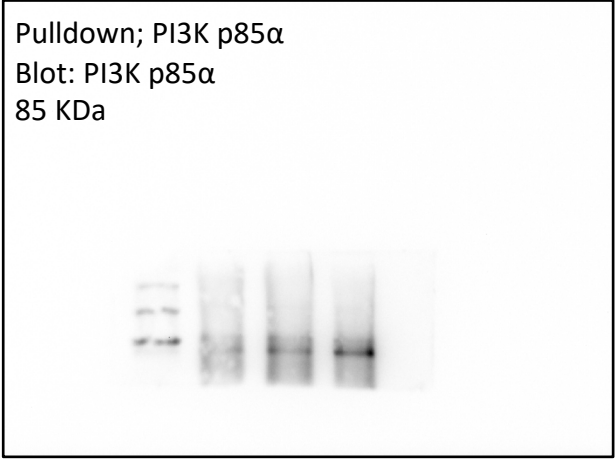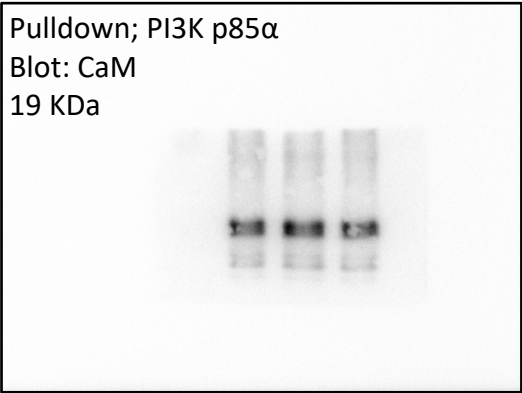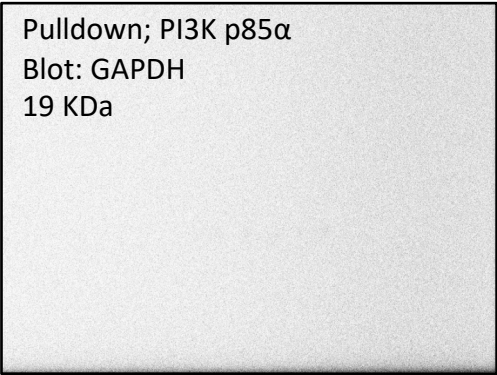

Figure 7C pH 6.5

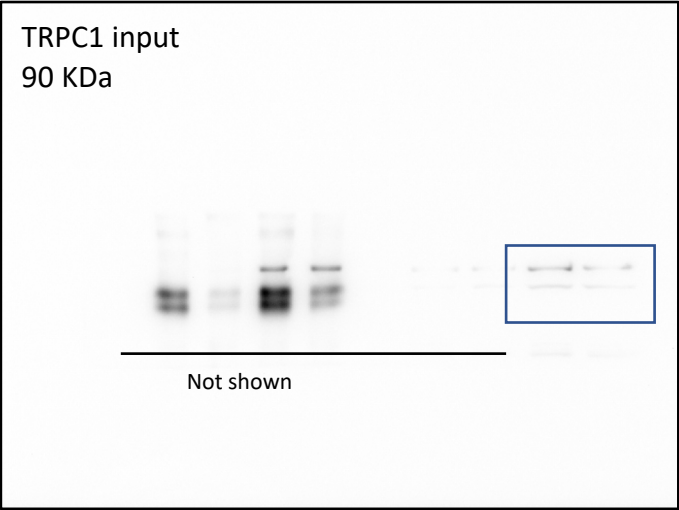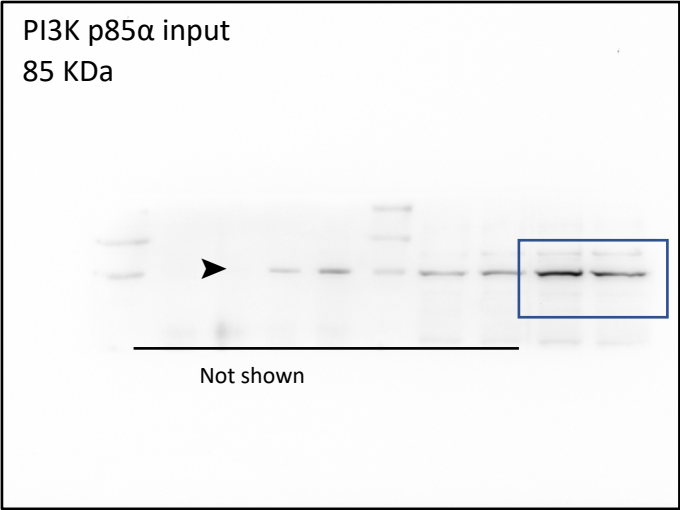

Figure 7C pH 6.5

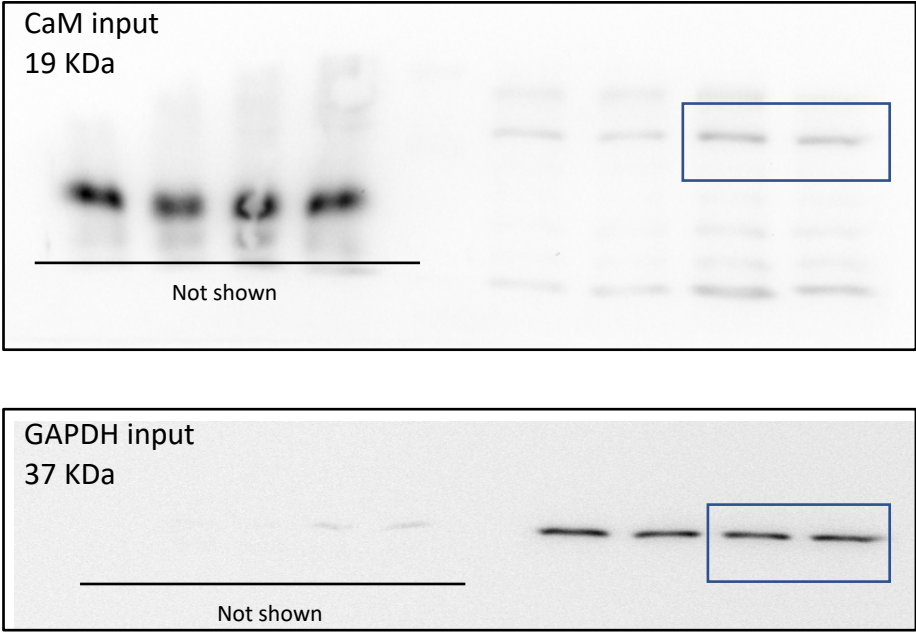

Figure 7C pH 7.4R

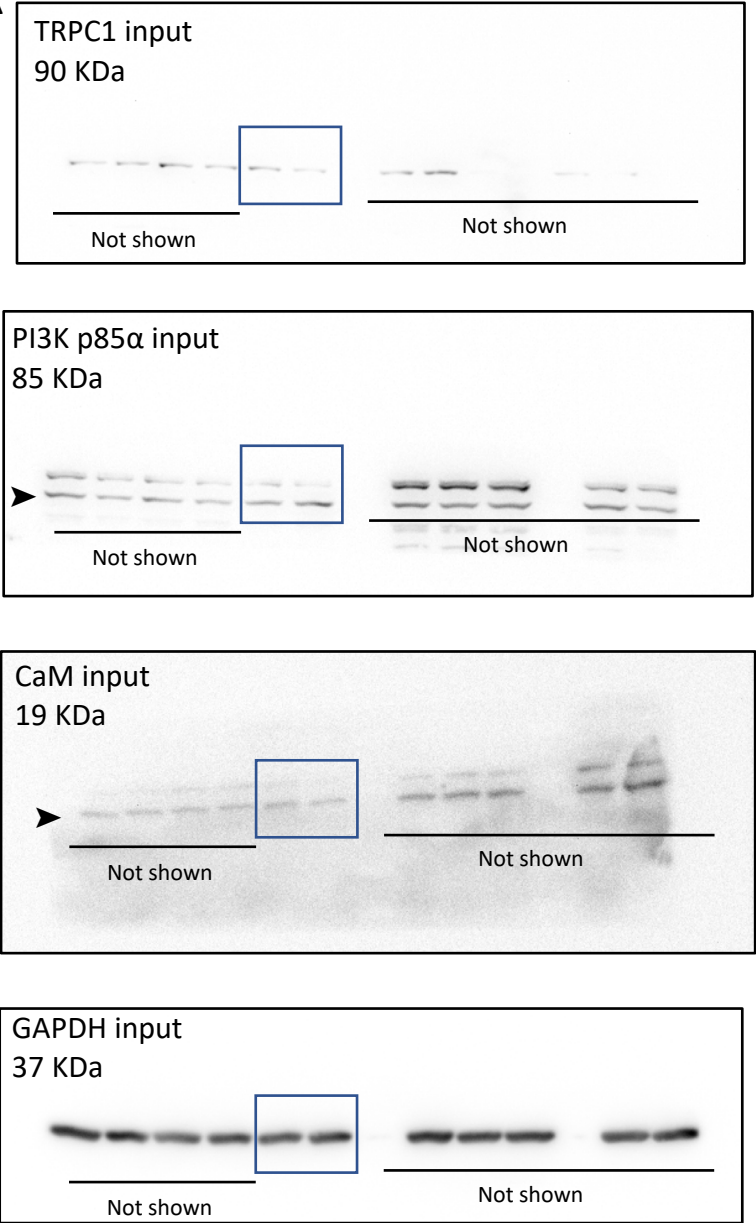

Figure 7C pH 6.5

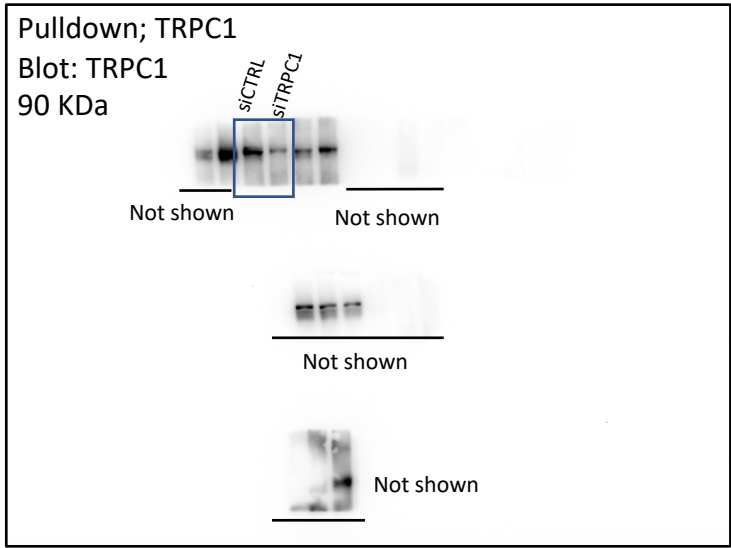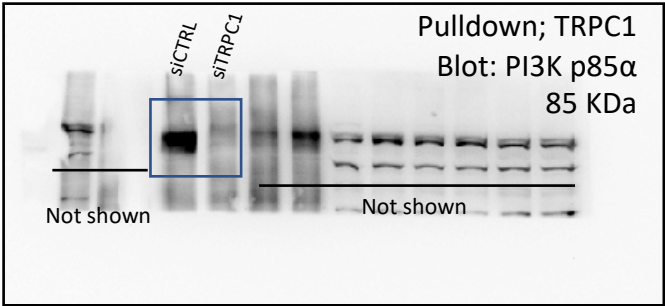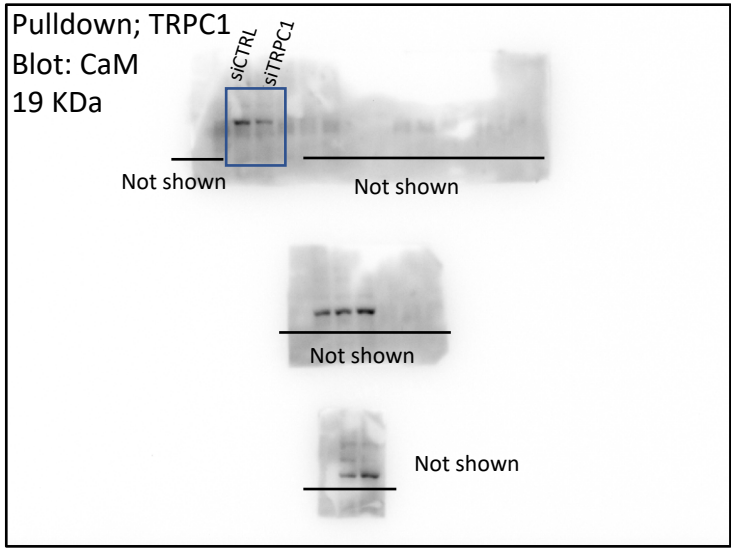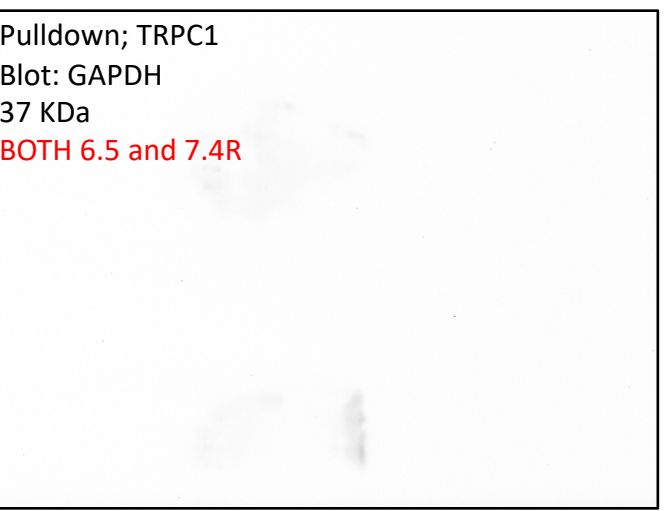

Figure 7C pH 7.4R

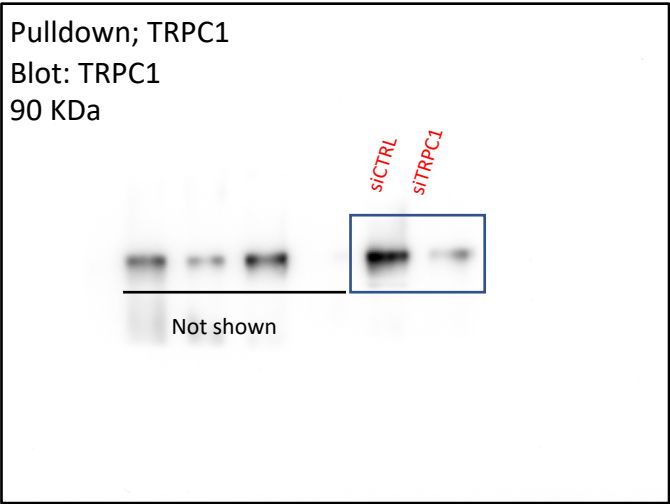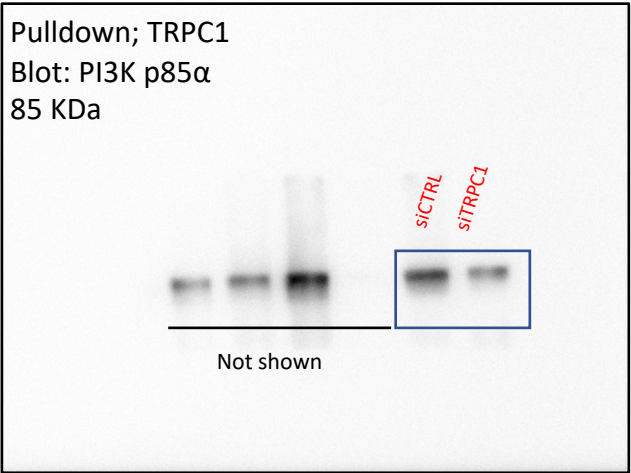



Figure 7C pH 7.4R

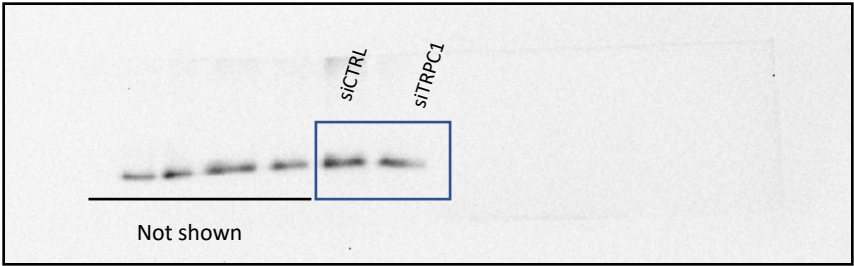

Figure 8

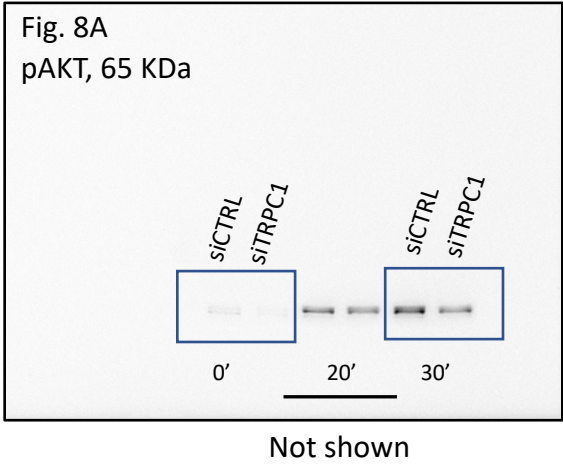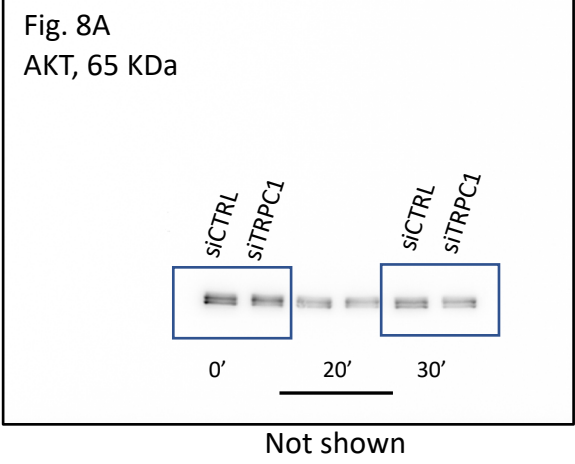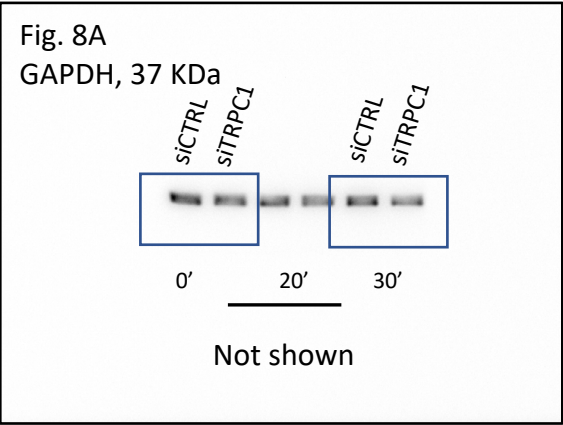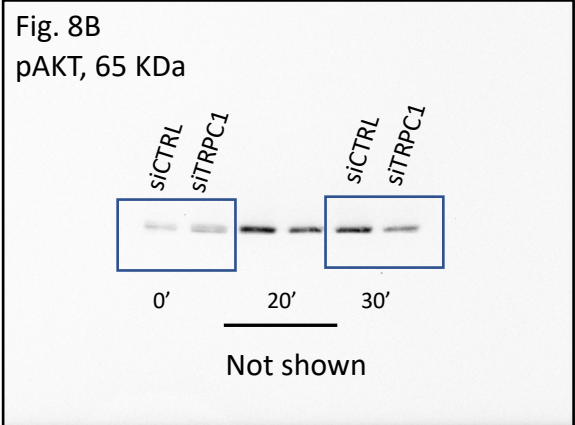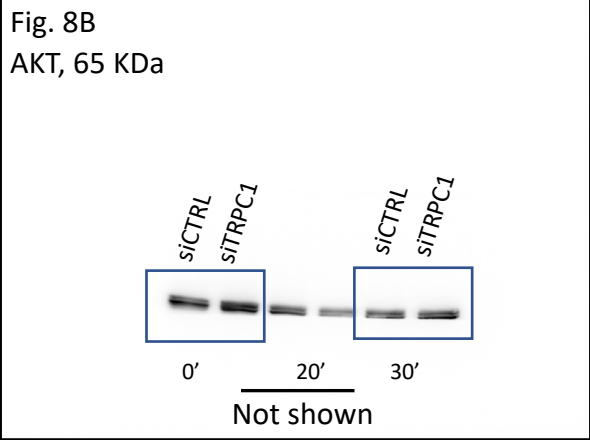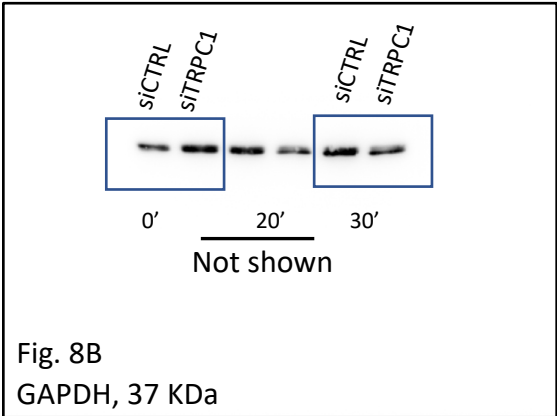

Figure 8

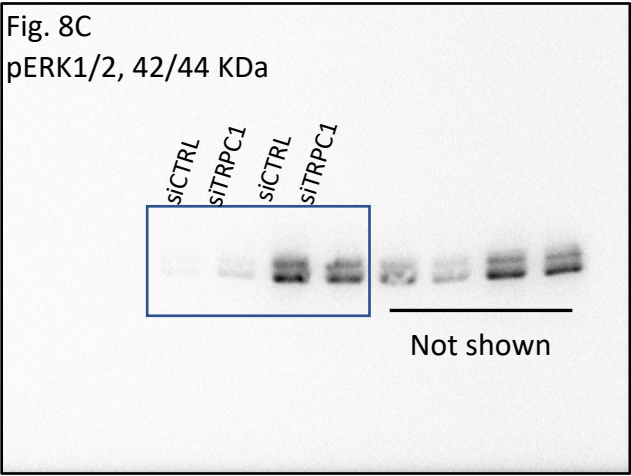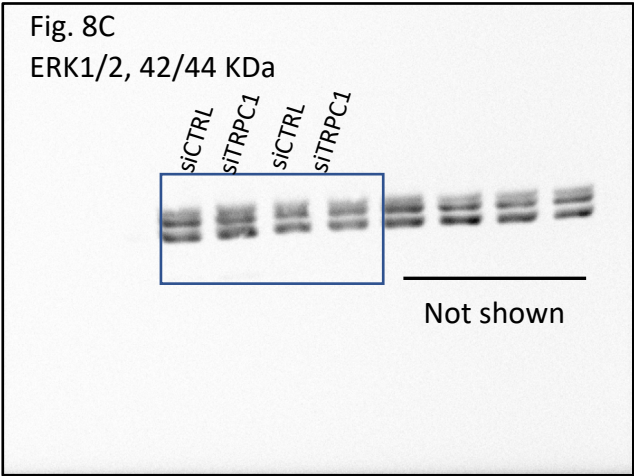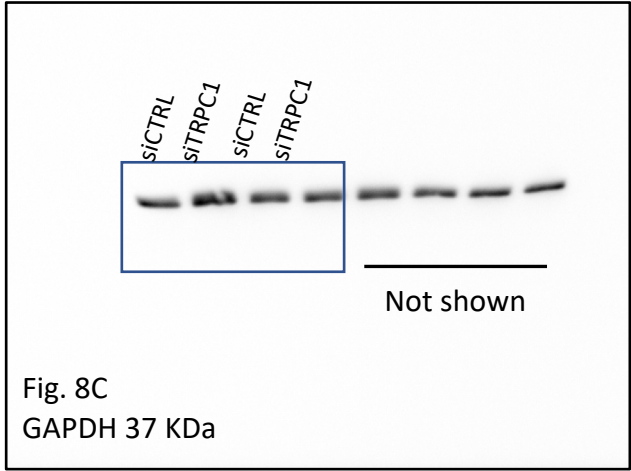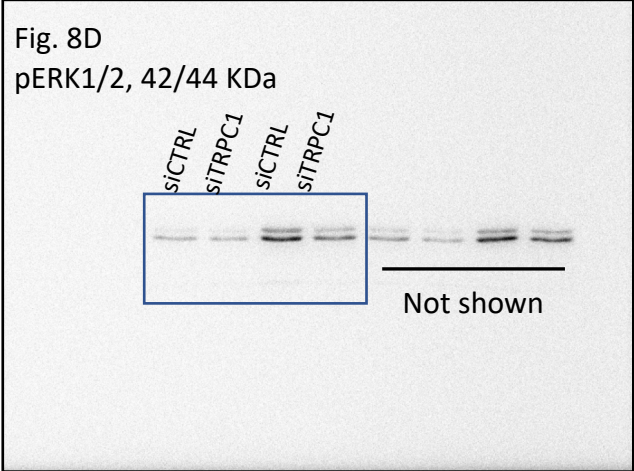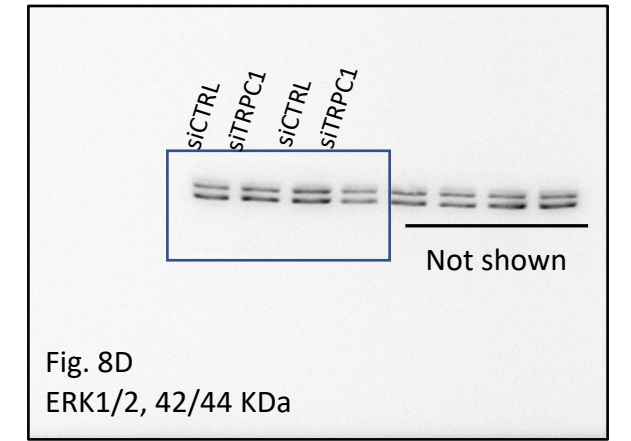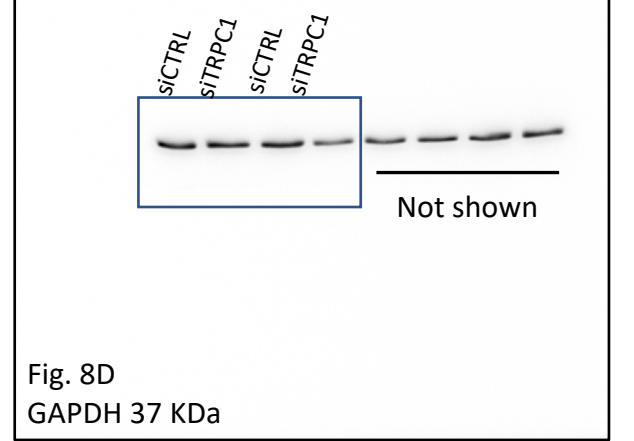

Supplemental Figure S4

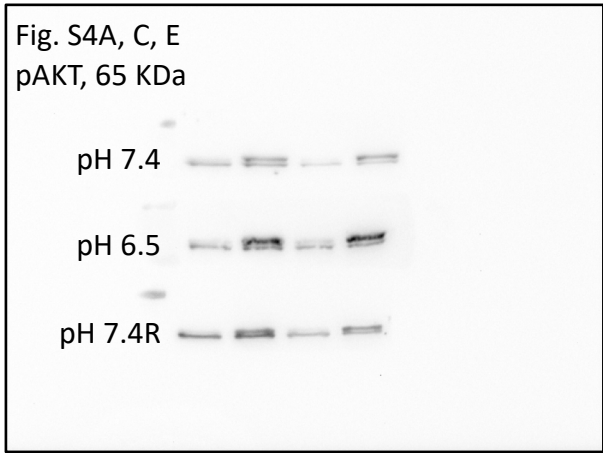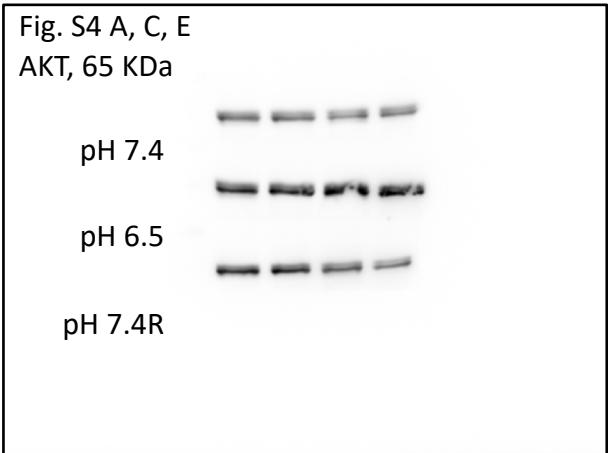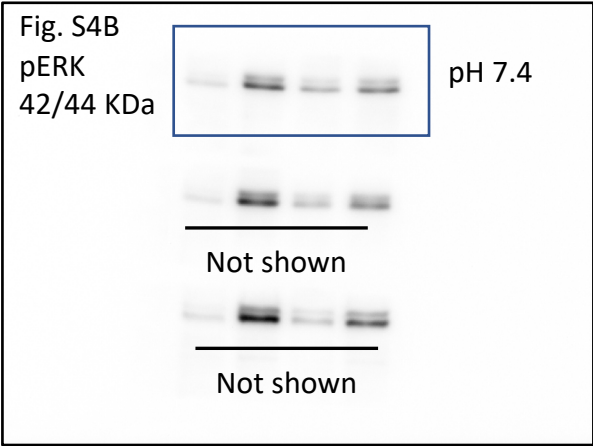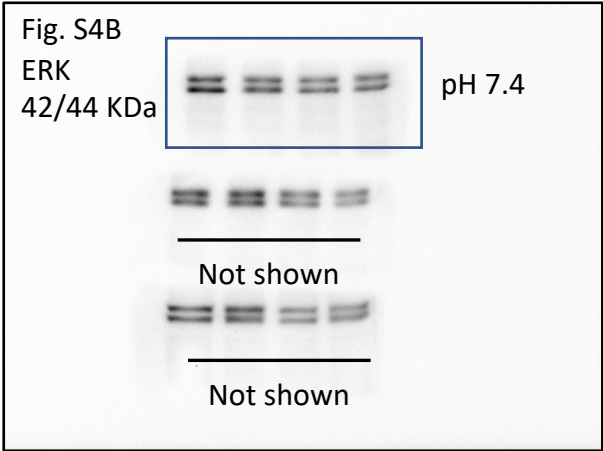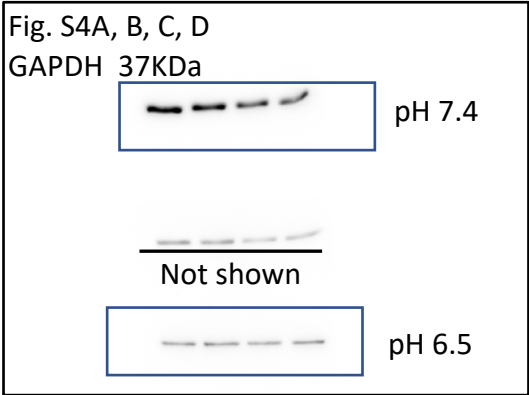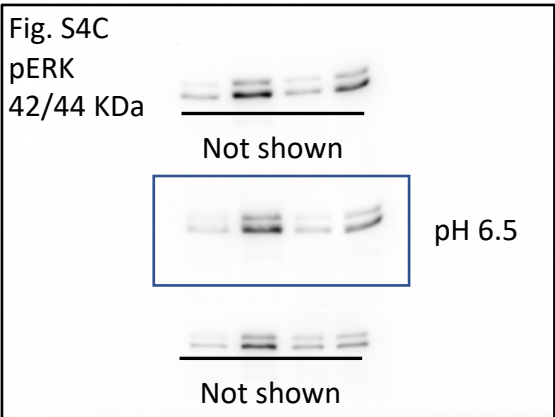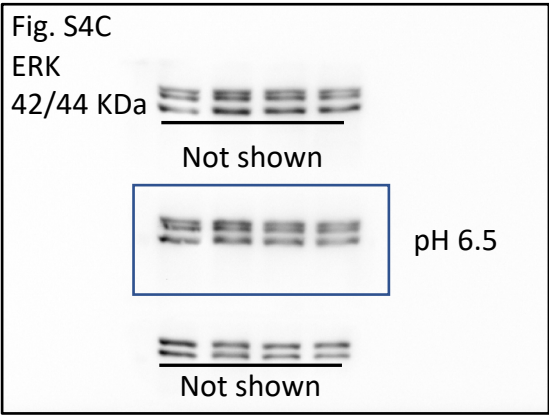

# Supplemental Figure S4

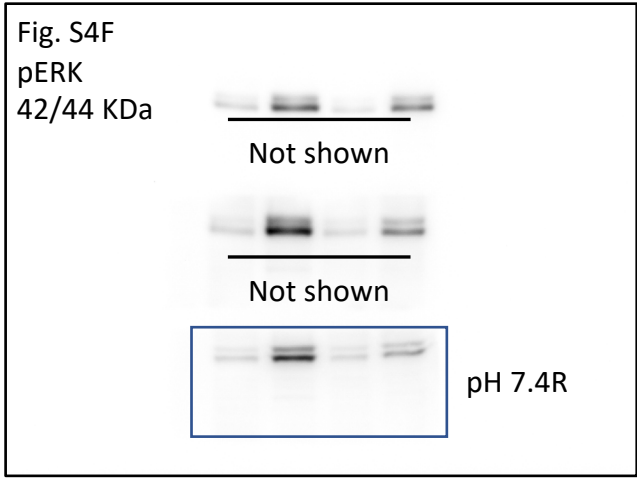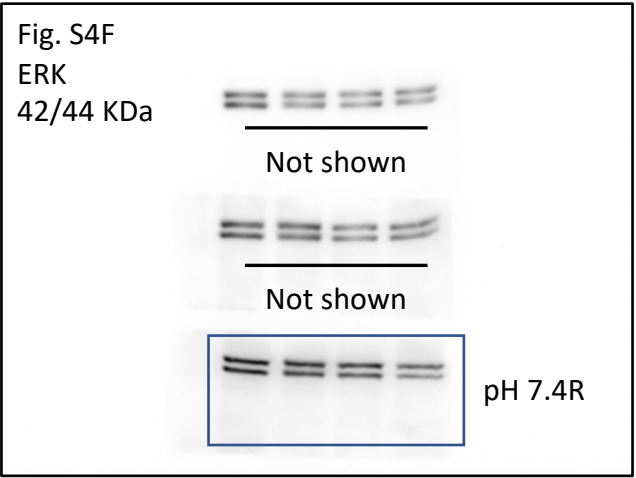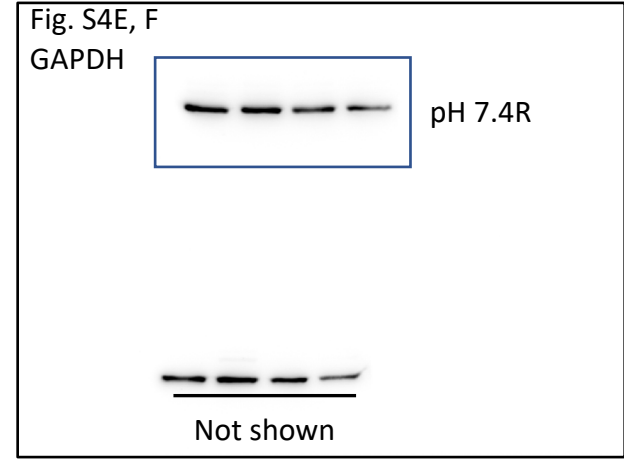

Supplement: s1 [file s1]
